1 **3D mapping of host-parasite-microbiome interactions**  
2 **reveals metabolic determinants of tissue tropism and disease**  
3 **tolerance in Chagas disease**

4

5

6 Ekram Hossain<sup>1,2</sup>, Sharmily Khanam<sup>2,3</sup>, Chaoyi Wu<sup>1,2</sup>, Sharon Lostracco-Johnson<sup>4</sup>, Diane  
7 Thomas<sup>4</sup>, Michelle Katemauswa<sup>1</sup>, Camil Gosmanov<sup>1</sup>, Danyang Li<sup>5</sup>, Christine Woelfel-  
8 Monsivais<sup>2,3</sup>, Krithivasan Sankaranarayanan<sup>2,3\*</sup>, Laura-Isobel McCall<sup>1,2,3\*</sup>

9

10 Affiliations:

11 <sup>1</sup>Department of Chemistry and Biochemistry, University of Oklahoma, Norman, Oklahoma,  
12 United States of America

13 <sup>2</sup>Laboratories of Molecular Anthropology and Microbiome Research, University of Oklahoma,  
14 Norman, Oklahoma, United States of America

15 <sup>3</sup>Department of Microbiology and Plant Biology, University of Oklahoma, Norman, Oklahoma,  
16 United States of America

17 <sup>4</sup>Skaggs School of Pharmacy and Pharmaceutical Sciences, University of California San Diego,  
18 La Jolla, California, United States of America

19 <sup>5</sup>College of Chemistry, Beijing Normal University, Beijing, China

20

21

22 E-mails:

23 [ehossain@ou.edu](mailto:ehossain@ou.edu)

24 [khanams@ou.edu](mailto:khanams@ou.edu)

25 [chaoyiwu0810@ou.edu](mailto:chaoyiwu0810@ou.edu)

26 [sharizy@gmail.com](mailto:sharizy@gmail.com)

27 [d4thomas@ucsd.edu](mailto:d4thomas@ucsd.edu)

28 [mitchelle.katemauswa@ou.edu](mailto:mitchelle.katemauswa@ou.edu)

29 [camil@ou.edu](mailto:camil@ou.edu)

30 [201611150915@mail.bnu.edu.cn](mailto:201611150915@mail.bnu.edu.cn)

31 [christinewm@ou.edu](mailto:christinewm@ou.edu)

32 [ksankar@ou.edu](mailto:ksankar@ou.edu)

33 [lmccall@ou.edu](mailto:lmccall@ou.edu)

34

35

36 \* Correspondence for 16S analyses to Krithivasan Sankaranarayanan, [ksankar@ou.edu](mailto:ksankar@ou.edu)

37 Correspondence for LC-MS/MS, Chagas disease, and overall project design to Laura-Isobel

38 McCall, [lmccall@ou.edu](mailto:lmccall@ou.edu)

39

40

41

42 **Abstract:** Chagas disease (CD) is a parasitic infection caused by *Trypanosoma cruzi* protozoa.  
43 Over 8 million people worldwide are *T. cruzi*-positive, 20-30% of which will develop  
44 cardiomyopathy, megaesophagus and/or megacolon. The mechanisms leading to  
45 gastrointestinal (GI) symptom development are however poorly understood. To address this  
46 issue, we systematically characterized the spatial impact of experimental *T. cruzi* infection on the  
47 microbiome and metabolome across the GI tract. The largest microbiota perturbations were  
48 observed in the proximal large intestine in both acute and chronic disease, with chronic-stage  
49 effects also observed in the cecum. Strikingly, metabolomic impact of acute-to-chronic stage  
50 transition differed depending on the organ, with persistent large-scale effects of infection  
51 primarily in the oesophagus and large intestine, providing a potential mechanism for GI  
52 pathology tropism in CD. Infection particularly affected acylcarnitine and lipid metabolism.  
53 Building on these observations, treatment of infected mice with carnitine-supplemented drinking  
54 water prevented acute-stage mortality with no changes in parasite burden. Overall, these results  
55 identified a new mechanism of disease tolerance in CD, with potential for the development of  
56 new therapeutic regimens. More broadly, these results highlight the potential of spatially-  
57 resolved metabolomic approaches to provide insight into disease pathogenesis, with translational  
58 applications for infectious disease drug development.

59  
60 **Introduction:** Chagas disease (CD), also known as American trypanosomiasis, is a neglected  
61 tropical disease endemic in Latin America <sup>1</sup>. However, due to migration CD now has a global  
62 reach spanning North America, Europe and Asia <sup>2</sup>. Six to eight million people are infected with  
63 *T. cruzi*, with approximately 12,000 deaths per year <sup>3</sup>. CD is caused by infection with the  
64 protozoan parasite *Trypanosoma cruzi*. Infected individuals pass first through an acute disease  
65 stage, usually asymptomatic, then to a chronic asymptomatic (indeterminate) stage that can last  
66 for decades. Thirty to forty percent of infected individuals progress from indeterminate to  
67 determinate (symptomatic) chronic CD <sup>4</sup>, 20-30% with cardiovascular complications (heart  
68 failure, arrhythmias, and thromboembolism) and 15-20% of infected individuals with  
69 gastrointestinal (GI) symptoms (megaesophagus and megacolon) <sup>5</sup>. Digestive CD has been  
70 neglected compared to cardiac CD and consequently is much more poorly understood. However,  
71 recent studies using bioluminescent parasites in mouse models have shown that specific sites in  
72 the GI tract are parasite reservoirs in chronic CD and may be major contributors to cardiac

73 symptom development, particularly after treatment failure<sup>678</sup>. Treatment of GI CD is also  
74 challenging, with limited options once symptoms become apparent<sup>1</sup>. There is therefore a strong  
75 need to improve our understanding of the interaction between *T. cruzi* and the GI tract, both to  
76 clarify mechanisms of GI CD pathogenesis, and to define GI factors contributing to cardiac CD,  
77 leading to new treatment strategies.

78 The GI tract is a complex environment where host, pathogen and microbiota interact to  
79 affect disease pathogenesis<sup>9</sup>. We previously demonstrated that *T. cruzi* infection affects the fecal  
80 microbiome and metabolome, but information on the specific GI sites driving this output had not  
81 yet been determined<sup>10</sup>. In this study, we applied a novel integration of small molecule-focused  
82 liquid chromatography-tandem mass spectrometry (LC-MS/MS) and 3D modeling (“chemical  
83 cartography”), in conjunction with microbiome analysis, to systematically characterize the *T.*  
84 *cruzi*-induced changes in the GI microenvironment in acute and chronic CD. We specifically  
85 focused on small molecule characterization because they represent the output of cellular  
86 processes as well as their regulators, and therefore have the closest relationship to phenotype<sup>11</sup>.  
87 Given that most drugs are still small molecule-based<sup>12</sup>, we further hypothesized that identifying  
88 infection-associated disturbances in the small molecule profile can most rapidly lead to new  
89 treatments for CD.

90 Results identified organ-specific and organ sub-site-specific magnitudes of disruptions in  
91 the chemical and microbial GI environment by *T. cruzi*, and highlighted differential mechanisms  
92 of acute to chronic stage transitions depending on organ. These results provide a mechanism by  
93 which consistent perturbations of tissue biochemical pathways lead to GI CD pathology in the  
94 oesophagus and large intestine. Consistent infection-induced elevation of acylcarnitine family  
95 members across organs further led us to investigate the role of acylcarnitines in disease  
96 pathogenesis. Supplementing animal drinking water with carnitine prevented acute-stage  
97 mortality in experimental CD in the absence of antiparasitic effect, revealing a novel mechanism  
98 of disease tolerance in CD. Overall, these results identified novel mechanisms of CD  
99 pathogenesis, with major translational applications to CD drug development. Furthermore, the  
100 data collected here on uninfected animals, and our approach in general, can serve as a reference  
101 to investigate determinants of tropism and novel treatment strategies for any other GI pathogen.

102

103

## 104 **Results:**

### 105 **Regiospecific molecular impact of *T. cruzi* colonization in the GI tract**

106 GI CD is still poorly understood. In our prior work, we identified specific small  
107 molecules correlated with cardiac parasite tropism<sup>13</sup>. Here, we sought to identify the  
108 locoregional chemical changes associated with parasite GI colonization. Mice were infected with  
109 1,000 luciferase-expressing *T. cruzi* strain CL Brener parasites<sup>6</sup>. Twelve days (acute stage) and  
110 89 days (chronic stage) post-infection, animals were euthanized, the GI tract sectioned (**Fig.**  
111 **S1a**), and parasite burden in each section determined by *ex vivo* bioluminescence imaging (**Fig.**  
112 **1abc**). At 12 days post infection, parasite burden was high throughout the GI tract, with the  
113 highest parasite burden in the distal small intestine (position 9;  $p < 0.05$  Student's T-test, distal  
114 small intestine to mid and distal stomach, small intestine position 6 and small intestine position  
115 7), and the lowest parasite burden in the cecum (position 10,  $p < 0.05$  Student's T test cecum vs  
116 oesophagus, distal small intestine and distal large intestine; **Fig. 1ab**). In contrast, at 89 days  
117 post-infection, the parasite burden was highest in the cecum ( $p < 0.05$  Student's T-test, cecum vs  
118 oesophagus, proximal and distal small intestine), and lowest in the proximal small intestine  
119 ( $p < 0.05$  Student's T-test, small intestine positions 5 and 6 vs oesophagus, proximal and distal  
120 large intestine, **Fig. 1ac**). In general, as expected, parasite burden decreased from the acute stage  
121 to the chronic stage (**Fig. S1b**). However, surprisingly, parasite burden increased in the cecum  
122 during the acute to chronic transition, suggesting a possible role for the cecum as a parasite  
123 reservoir protected from antiparasitic immune responses (**Fig. S1b**). These observations support  
124 the concept that all GI sites can initially harbor *T. cruzi*, but then differentially respond to  
125 parasite presence, leading to the ability of the parasite to persist and cause damage in some sites  
126 but not others.

127 Given this differential parasite tropism in the chronic stage and the unique aspects of CD  
128 pathology, we sought to investigate the molecular determinants of parasite persistence vs disease  
129 resolution. To do so, we extracted small molecules (metabolites) from each collected GI section  
130 (637 samples total) and analyzed these molecules by LC-MS/MS in positive and in negative  
131 mode. As expected, the strongest determinant of overall chemical profile was the source organ,  
132 and sample position within that organ, as observed by principal coordinate (PCoA) analysis (**Fig.**  
133 **1d**, PERMANOVA based on source organ,  $p < 0.001$ ,  $R^2 = 46.374\%$  for positive mode LC-MS/MS  
134 analysis and  $p < 0.001$ ,  $R^2 = 47.033\%$  for negative mode LC-MS/MS analysis; PERMANOVA

135 based on sampling position,  $p < 0.001$ ,  $R^2 = 13.494\%$  for positive mode LC-MS/MS analysis and  
136  $p < 0.001$ ,  $R^2 = 16.477\%$  for negative mode LC-MS/MS analysis (12 days post-infection);  
137 PERMANOVA based on sampling position,  $p < 0.001$   $R^2 = 12.067\%$  positive mode and  $p < 0.001$   
138  $R^2 = 13.918\%$  negative mode (all timepoints combined)). Overall impact of infection was much  
139 more minor (**Fig. S2, S3**, PERMANOVA based on infection status, acute stage,  $p = 0.019$ ,  
140  $R^2 = 1.011\%$  for positive mode LC-MS/MS analysis and  $p = 0.07$ ,  $R^2 = 0.692\%$  for negative mode  
141 LC-MS/MS analysis; PERMANOVA based on infection status, chronic stage,  $p = 0.014$ ,  
142  $R^2 = 0.982\%$  for positive mode LC-MS/MS analysis and  $p = 0.007$ ,  $R^2 = 0.981\%$  for negative mode  
143 LC-MS/MS analysis). Comparison of chemical families differentially-modulated by infection  
144 also identified few commonalities between sample sites (**Fig. S4, S5**). We therefore focused our  
145 analysis on the impact of infection in each individual organ. Visualization of the chemical profile  
146 in each organ in relationship to infection status using PCoA analysis revealed organ-specific  
147 differences in the impact of *T. cruzi* infection. Acute-stage infection was associated with major  
148 disturbances in the overall oesophagus chemical profile (PERMANOVA  $p = 0.002$ ,  $R^2 = 15.871\%$ ),  
149 with lower-scale perturbations in the small intestine and cecum (PERMANOVA  $p < 0.001$ ,  
150  $R^2 = 6.95\%$  and PERMANOVA  $p = 0.02$ ,  $R^2 = 10.411\%$ , respectively) (**Fig. 1e, S6**). The strongest  
151 acute-stage disruption within the small intestine chemical environment was observed in the distal  
152 small intestine, where parasite burden is the highest (**Fig. 1e**, PERMANOVA  $p < 0.001$ ,  
153  $R^2 = 30.198\%$ ;  $p < 0.001$ ,  $R^2 = 26.063\%$ ;  $p = 0.006$ ,  $R^2 = 12.564\%$ , for positions 7, 8, 9, respectively).  
154 These changes resolved in the chronic stage for the cecum (PERMANOVA  $p = 0.171$ ,  
155  $R^2 = 6.955\%$ ), decreased in magnitude for the small intestine ( PERMANOVA  $p < 0.001$ ,  
156  $R^2 = 4.824$ ), became apparent in the stomach and large intestine (PERMANOVA  $p = 0.021$ ,  
157  $R^2 = 4.429\%$  and PERMANOVA  $p = 0.008$ ,  $R^2 = 6.323\%$ , respectively), and increased in magnitude  
158 in the oesophagus (PERMANOVA  $p < 0.001$ ,  $R^2 = 38.061\%$ ). Importantly, the largest statistically  
159 significant sites of metabolome disturbance in the chronic stage were the oesophagus and large  
160 intestine, which are the sites of damage in symptomatic chronic-stage GI CD <sup>14</sup>. On a per-  
161 sampling site basis, spatial heterogeneity in terms of overall effect size ( $R^2$ ) was observed within  
162 a given organ. The largest increase in  $R^2$  during the transition from the acute to the chronic stage  
163 were observed in the oesophagus, distal stomach and central large intestine (2.4, 2.0 and 1.9-fold  
164 increases, respectively).

165           Next, we investigated the nature of the chemical shifts associated with these infection-  
166 altered chemical profiles. Feature annotation rates were considerably higher in positive mode  
167 than in negative mode (35.4% vs 10.2%), so we focused this analysis on our positive mode LC-  
168 MS/MS data. We used machine learning (random forest) approaches to identify specific  
169 molecular features driving the differences between infected and uninfected tissues. Given our  
170 observations on the impact of sampling position on metabolite features (PCoA, **Fig. 1d**, **Fig. S2**,  
171 **Fig. S3**, **Fig. S5**), these comparisons were independently performed for each organ. In the acute  
172 stage, we observed elevation in specific acylcarnitines and specific phosphatidylcholine (PC)  
173 family members in the different organs (**Fig. 2a-f**, **Table S1**, **Fig. S7**). We also observed  
174 elevation in kynurenine in the stomach and large intestine in the acute stage. These differences  
175 persisted in the chronic stage for the proximal and central large intestine only (**Fig. 2g-h**, **Table**  
176 **S1**, **Fig. S7**). Strikingly, the levels of tryptophan, the precursor of kynurenine, were  
177 correspondingly decreased in the acute stage at the same large intestine sites where kynurenine  
178 was elevated, whereas it was increased by infection in the chronic stage in the oesophagus (**Fig.**  
179 **2i-j**). Kynurenine is induced by inflammation; kynurenine metabolites have direct antiparasitic  
180 effects and contribute to the control of acute *T. cruzi* infection <sup>15</sup>. However, they can also induce  
181 regulatory T cells <sup>16</sup>, and as such, our observation of kynurenine persistence in the large intestine  
182 may contribute to parasite persistence in this organ. In accordance with our prior observations in  
183 the context of the fecal metabolome <sup>10</sup>, specific large intestine and small intestine bile acid  
184 derivatives were increased in infected mice (**Fig. 2k-m**, **Table S1**, **Fig. S7**). At 89 days post-  
185 infection, molecular features identified as elevated by infection include specific acylcarnitines  
186 (*e.g.* C20:4 acylcarnitine in the oesophagus), specific PCs (*e.g.* PC(22:5), PC(20:4), PC(22:6) in  
187 the oesophagus; PC(22:4) in the large intestine), specific amino acids and derivatives (*e.g.*  
188 kynurenine in the large intestine, tryptophan in the oesophagus) (**Fig. 2a-j**, **Table S1**, **Fig. S7**).  
189 Importantly, the pattern of persistence of these metabolic changes reflected known sites of CD:  
190 for example, most of the top 10 metabolic perturbations observed in the acute stage in the  
191 oesophagus were still perturbed by infection in the chronic stage, whereas none of the small  
192 intestine acute-stage perturbations persisted in the chronic stage (**Fig. 2**, **Table S1**). Overall,  
193 these results identified tissue metabolic changes linked to CD tropism and pathogenesis, at the  
194 scale of overall chemical disturbances, as well as several metabolic pathways correlated with  
195 infection status.

196

## 197 **Impact of *T. cruzi* colonization on the GI tract microbiome**

198 Several of the molecules identified in our dataset are of microbial origin or microbially-  
199 modified, such as indole-L-lactate, indoxyl sulfate and secondary bile acids (**Fig. S8, Table S2**).  
200 Dataset match analysis through the GNPS platform<sup>17</sup> identified 1689 unique matches in our  
201 positive mode dataset to pure bacterial culture datasets not shared with pure mammalian culture  
202 datasets, known plastics-derived contaminants or blank files, suggesting a potential bacterial  
203 origin. Studies comparing germ-free and colonized mice have also shown that the microbiota  
204 influences a variety of the metabolites detected in our study, including tryptophan, tyrosine and  
205 maltotriose<sup>1819</sup>. Tryptophan and tyrosine in particular were affected by infection (tryptophan:  
206 decreased in the large intestine overall, Mann-Whitney  $p=6.793e-06$  (acute stage) and  
207  $p=0.004313$  (chronic stage); tyrosine: decreased in the large intestine overall, Mann-Whitney  
208  $p=0.01518$  (acute stage), non-significant (chronic stage)). We have previously demonstrated that  
209 experimental *T. cruzi* infection alters the fecal microbiome and metabolome<sup>10</sup>, a finding that was  
210 recently confirmed in *T. cruzi*-infected children in Bolivia<sup>20</sup>. We therefore sought to evaluate the  
211 spatial impact of *T. cruzi* infection on the microbiota at each collection site in acute-stage disease  
212 (except for the oesophagus where insufficient material was available to perform both  
213 metabolomic and 16S analyses), and focusing on the cecum and large intestine in chronic  
214 disease, given their role as major sites of CD pathogenesis and the unique metabolomic pattern  
215 observed at these sites (**Fig. 1e**).

216 Differences in the overall microbiota composition (beta-diversity, all sites combined for a  
217 given organ) were observed in the stomach and large intestine in the acute stage (PERMANOVA  
218  $p=0.05$ ,  $R^2=3.22\%$  and PERMANOVA  $p=0.04$ ,  $R^2=3.837\%$ , respectively), with non-significant  
219 changes in the small intestine and cecum (PERMANOVA  $p=0.069$ ,  $R^2=1.791\%$  and  
220 PERMANOVA  $p=0.058$ ,  $R^2=10.657\%$ , respectively). These differences increased in magnitude  
221 for the cecum and large intestine during the transition from acute to chronic stage  
222 (PERMANOVA  $p=0.02$ ,  $R^2=11.556\%$  and PERMANOVA  $p=0.002$ ,  $R^2=5.83\%$ , respectively)  
223 (**Fig. 3a-f**). Spatial heterogeneity was also observed within an organ (**Fig. 3g**), with the highest  
224 disturbances in the microbiota found in the proximal large intestine (sampling position 11,  
225 PERMANOVA  $p=0.022$ ,  $R^2=12.36\%$  and PERMANOVA  $p=0.009$ ,  $R^2=10.715\%$  for acute and  
226 chronic stage, respectively). Persistent disturbances in the large intestine microbiota reflect our

227 findings for the large intestine metabolome, while the discrepancies between cecal microbiota  
228 and metabolome findings may reflect persistent luminal rather than tissue alterations. Overall,  
229 the persistence of microbiota alterations in these sites correlates well with our observation of  
230 continued alterations of the fecal microbiota and metabolome through acute and chronic  
231 experimental CD<sup>10</sup>. In accordance with prior reports<sup>2010</sup>, no significant differences in alpha-  
232 diversity were observed (**Fig. S9**) between infected and uninfected tissue in both acute and  
233 chronic stages. Notably, the effect size observed for microbiota composition analysis was lower  
234 than for our tissue metabolomics analysis (**Fig. 1**), although in both cases the proximal large  
235 intestine was one of the major sites of infection-associated perturbation. This may reflect  
236 segregation of the microbiome from the site of infection, so that only indirect effects can be  
237 observed. Furthermore, cage and batch effects were found to have a larger impact on microbiome  
238 composition (**Fig. S10**), while metabolome analysis was more robust to such effects, as we  
239 previously reported<sup>10</sup>.

240

#### 241 **Role of acylcarnitines in CD tolerance**

242 Translating ‘omics findings into novel therapeutic approaches is one of the major  
243 challenges of this post-genome era. Because we observed larger metabolome than microbiome  
244 infection-associated perturbations, and based on our current observations of infection-induced  
245 elevation in specific acylcarnitine family members, and our prior findings of differential cardiac  
246 acylcarnitine distribution and mass range in mild vs severe acute *T. cruzi* infection<sup>13</sup>, we focused  
247 here on acylcarnitines and the potential of acylcarnitine modulation for CD treatment. The  
248 acylcarnitine sub-network (**Fig. 4a**) was manually annotated (**Table S3, Fig. S11a**), and impacts  
249 of infection on short-chain (C3-C4), mid-chain (C5-C11) and long-chain (C12 and greater)  
250 acylcarnitines assessed. While total and short-chain GI short-chain acylcarnitine levels were  
251 comparable between infected and uninfected animals 12 days post-infection (**Fig. S11bc**), we  
252 observed significant elevation in total and short-chain acylcarnitine levels at each small intestine  
253 site, in infected animals (total acylcarnitines: FDR-corrected Mann-Whitney  $p=0.00543$ ,  
254  $p=0.000422$ ,  $p=7.04e-05$ ,  $p=7.04e-05$ ,  $p=0.000422$  for positions 5, 6, 7, 8, 9; short-chain  
255 acylcarnitines: FDR-corrected Mann-Whitney  $p=0.000668$ ,  $p=0.000563$ ,  $p=0.000141$ ,  
256  $p=0.000563$ ,  $p=0.00189$  for positions 5, 6, 7, 8, 9; **Fig. S11de**). For long-chain acylcarnitines,  
257 infection-induced acylcarnitine elevation was restricted to the distal portions of the small



258 intestine (FDR-corrected Mann-Whitney  $p=0.000141$ ,  $p=0.000563$ ,  $p=0.000563$  for positions 7,  
259 8, 9; **Fig. 4bc**). This difference between total and spatially-resolved short-chain acylcarnitine  
260 levels highlight the strength of our chemical cartography approach. Mid-chain (C5 to C11)  
261 acylcarnitine levels were not significantly different 12 days post-infection between infected and  
262 uninfected animals at any GI site (**Fig. S11f**). Acylcarnitine small intestine elevation was no  
263 longer observed in the chronic stage, except for short-chain acylcarnitines in the duodenum  
264 (sampling position 5, FDR-corrected Mann-Whitney  $p=0.0253$ ), although select other GI sites  
265 showed infection-induced increases in acylcarnitines (**Fig. S11ghi**; distal large intestine, total  
266 acylcarnitines and short-chain acylcarnitines, FDR-corrected Mann-Whitney  $p=0.0196$  and  
267  $p=0.0387$ , respectively; oesophagus, short-chain acylcarnitines, FDR-corrected Mann-Whitney  
268  $p=0.00422$ ). Acetyl-carnitine was also elevated in select sites 12 days post-infection (FDR-  
269 corrected Mann-Whitney  $p=0.0220$ ,  $p=0.003413$ ,  $p=0.000141$ ,  $p=0.000141$ ,  $p=0.0008913$ ,  
270  $p=0.0220$  for sites number 4-9 (stomach and small intestine, 12 days post-infection)), but was  
271 comparable between infected and uninfected tissues at all sites 89 days post-infection (**Fig.**  
272 **S11jk**). In contrast, unmodified carnitine levels were comparable throughout the intestine 12  
273 days post-infection, and only significantly elevated in infected oesophagus and uninfected central  
274 large intestine 89 days post-infection (FDR-corrected Mann-Whitney  $p=0.000141$  and  $p=0.$   
275  $0187$ , respectively) (**Fig. S11l**).

276 To determine whether we could translate these findings towards novel CD therapeutics  
277 and whether these acylcarnitine alterations play a causal role in disease progression, we assessed  
278 whether carnitine supplementation could alter acute CD outcome. Mice were infected with either  
279 an intermediate dose (5,000 trypomastigotes) or a high dose (50,000 trypomastigotes) of  
280 luciferase-expressing CL Brener parasites <sup>6</sup>. At 7 days post-infection, animals were distributed  
281 into two groups of comparable parasite burden and one group switched from normal drinking  
282 water to drinking water supplemented with L-carnitine (equivalent to 100 mg/kg/day based on  
283 water consumption). Carnitine treatment completely abrogated acute CD-induced mortality up to  
284 7 weeks post-infection (**Fig. 4d**,  $p=0.0027$  Mantel-Cox test, 50,000 trypomastigote infection;  
285 **Fig. S12a**), but without any effect on parasite burden or parasite distribution (**Fig. 4ef, S12b**).  
286 This lack of antiparasitic activity is consistent with prior *in vitro* activity data showing no impact  
287 of carnitine on parasite burden <sup>21</sup>. Overall, these results indicate that acylcarnitine modulation by  
288 carnitine supplementation can induce disease tolerance in CD. These results have important

289 implications for our understanding of the factors that contribute to the progression from  
290 asymptomatic to symptomatic CD, and represent a novel avenue for CD drug development, in  
291 conjunction with antiparasitics to kill *T. cruzi*.

292

## 293 **Discussion:**

294 Disease severity is tied to the balance between resistance and tolerance mechanisms<sup>22</sup>.  
295 Resistance reduces pathogen load, but can cause collateral damage to the host, as indeed has  
296 been observed with immune clearance of *T. cruzi*-infected cells<sup>23</sup>. In contrast, tolerance reduces  
297 disease or immune-mediated collateral damage without affecting the pathogen load<sup>22</sup>. While  
298 parasite persistence is required for progression to chronic CD<sup>24</sup>, only a minority of infected  
299 patients progress to symptomatic disease<sup>4</sup>, and parasite load does not fully predict disease  
300 severity (*e.g.*<sup>25</sup>), indicating that disease tolerance mechanisms also regulate CD progression,  
301 although these are not well understood. Our novel finding that carnitine modulation determines  
302 infection outcome (**Fig. 4**) paves the way for future studies of the role of acylcarnitines in the  
303 progression from asymptomatic to symptomatic disease in humans, as well as the development  
304 of novel interventional strategies for CD, most likely in combination with antiparasitic agents.  
305 Our observations also represent the first time that carnitine metabolism has been directly linked  
306 to disease tolerance mechanisms, rather than serving as a readout for altered fatty acid  
307 metabolism. Importantly, acylcarnitines, as with many other infection-modulated metabolites in  
308 our dataset, showed strong spatial effects that would have been masked by bulk tissue analysis,  
309 demonstrating the strength of this spatially-resolved approach (**Fig. 2, Fig. 4b, Fig. S11**).  
310 Strikingly, sites of largest statistically significant overall metabolic disturbance in the chronic  
311 stage were the oesophagus and large intestine (**Fig. 1**), providing a mechanism whereby  
312 persistent metabolic alterations at these sites drive the striking selective tropism of CD for the  
313 large intestine and oesophagus. In contrast, chronic parasite persistence in the cecum was  
314 metabolically silent (**Fig. 1**), while cecal microbiome remained strongly and significantly  
315 affected by infection (**Fig. 3**). It is tempting to speculate a microbiota-mediated mechanism of  
316 reduced antiparasitic immune responses in the cecum, perhaps via cecal microbiota-derived  
317 short-chain fatty acid<sup>26</sup>, or induction of parasite dormancy at this site<sup>27</sup>, leading to the observed  
318 parasite recrudescence in the cecum following incomplete posaconazole or nifurtimox treatment  
319<sup>828</sup>, and this awaits further experimentation. Lastly, the spatially-resolved metabolomic and

320 microbiome methods that we illustrate here with *T. cruzi* can readily be applied to study other  
321 pathogens with specific tissue tropism, and we anticipate this approach to have broad  
322 applicability. Likewise, initial pathogen tropism is affected by tissue characteristics. Our  
323 comprehensive spatial characterization of the microbiome and metabolome of uninfected animals  
324 therefore represents a resource that can serve as a hypothesis-generating starting point for studies  
325 of pathogen tropism.

326

## 327 **Methods:**

328 ***In vivo* experimentation:** All vertebrate animal studies were performed in accordance with the  
329 USDA Animal Welfare Act and the Guide for the Care and Use of Laboratory Animals of the  
330 National Institutes of Health. The protocol was approved by the University of California San  
331 Diego Institutional Animal Care and Use Committee (protocol S14187).

332 For chemical cartography and 16S analysis: 5-week-old male C3H/HeJ mice (The  
333 Jackson Laboratory) were infected by intraperitoneal injection of 1,000 red-shifted luciferase-  
334 expressing *T. cruzi* strain CL Brener<sup>6</sup> culture-derived trypomastigotes in 100  $\mu$ L DMEM media  
335 (infected group) or mock-infected by injection of 100  $\mu$ L DMEM media only (uninfected group).  
336 Prior to animal infection, *T. cruzi* parasites were maintained in coculture with C2C12 mouse  
337 myoblasts, in DMEM (Invitrogen) supplemented by 5% iron-supplemented calf serum  
338 (HyClone) and 1% penicillin-streptomycin (Invitrogen). Twelve or 89 days post-infection,  
339 animals were injected with 150 mg/kg D-luciferin potassium salt (Gold Biotechnology) and  
340 euthanized by isoflurane overdose followed by cervical dislocation. Mice were then immediately  
341 perfused with 10 mL of 0.3 mg/mL ice-cold D-luciferin in PBS<sup>6</sup>. GI organs were collected,  
342 sectioned as displayed on **Fig. S1a** and each section placed in an individual 96-well-plate well  
343 containing 0.3 mg/mL ice-cold D-luciferin in PBS<sup>6</sup>. The plate was imaged in an *In vivo* Imaging  
344 System (IVIS) Lumina LT Series III (Perkin Elmer) and tissues were then immediately snap-  
345 frozen in liquid nitrogen, followed by storage at -80 °C. Tissue section luminescence was  
346 determined using Living Image 4.5 software, normalized to collected tissue weight, and plotted  
347 using GraphPad Prism version 8. Two biological replicate experiments were performed, each  
348 including n=5 mice for each timepoint and infection condition (total n=10 per timepoint and  
349 infection condition). The same samples were used as source material for 16S and LC-MS

350 analysis (see below), with each tissue site from each individual animal representing a single data  
351 point in each analysis.

352 For carnitine supplementation experiments: mice were infected with either an  
353 intermediate dose (5,000 culture-derived trypomastigotes) or a high dose (50,000 culture-derived  
354 trypomastigotes) of red-shifted luciferase-expressing CL Brener parasites <sup>6</sup>. Seven days post-  
355 infection, mice were injected with 150 mg/kg D-luciferin potassium salt (Gold Biotechnology)  
356 and imaged (IVIS Lumina LT Series III). Animals were allocated to treatment groups to have  
357 comparable total body luminescence signal between groups. Mice then received L-carnitine  
358 (VWR) in drinking water *ad libitum*, normalized to mouse water consumptions so that animals  
359 received ca. 100 mg/kg/day, or regular drinking water (n=5 per group). Bioluminescent imaging  
360 was performed weekly. Animals reaching humane endpoints of weight loss >20% were  
361 euthanized. Bioluminescence data was analyzed with Living Image 4.5 software and plotted  
362 using GraphPad Prism version 8.

363  
364 **Sample preparation for LC-MS/MS:** Samples from both biological replicate experiments were  
365 analyzed jointly. Metabolites were extracted from the collected tissue samples using a two-step  
366 process as implemented in our prior work <sup>13</sup>, normalizing to tissue weight. Tissue samples were  
367 homogenized in LC-MS grade water (50 mg tissue in 125  $\mu$ L water) using a 5 mm steel ball in  
368 Qiagen TissueLyzer at 25 Hz for 3 min. 10  $\mu$ L was set aside for DNA extraction and microbiome  
369 profile analysis, except for oesophagus where the tissue amount was too small. LC-MS grade  
370 methanol spiked with 4  $\mu$ M sulfachloropyridazine was added to the homogenized sample, to a  
371 final concentration of 50% methanol, and the sample was homogenized again at 25 Hz for 3 min.  
372 Homogenate was centrifuged for 15 min at 14,980g, 4 °C. The centrifugation supernatant was  
373 collected and dried in a Savant SPD111V (ThermoFisher Scientific) speedvac concentrator. The  
374 centrifugation pellet was resuspended in 3:1 (by volume) dichloromethane/methanol solvent  
375 mixture and further homogenized at 25 Hz for 5 minutes, followed by centrifugation at 14,980g  
376 for 2 minutes. This latter centrifugation supernatant was collected and air dried. Both extracts  
377 were stored at -80 °C until LC-MS analysis.

378  
379 **LC-MS/MS:** The dried samples were resuspended in 50% methanol (LC-MS grade) spiked with  
380 2 $\mu$ M sulphadimethoxine as internal control, pooling aqueous and organic extracts together.

381 Liquid chromatography was performed using a ThermoScientific Vanquish UHPLC system  
382 fitted with 1.7  $\mu\text{m}$  100  $\text{\AA}$  Kinetex C8 column (50 X 2.1 mm) (Phenomenex). Data-dependent  
383 MS/MS (ddMS<sup>2</sup>) experiments were performed on a Q Exactive Plus (ThermoScientific) high  
384 resolution mass spectrometer, under the control of XCalibur and Tune software  
385 (ThermoScientific). Ions were generated for MS/MS analysis in both positive and negative ion  
386 mode using heated electrospray ionization (HESI) source. Calibration of the instrument was  
387 performed using recommended commercial calmix from ThermoScientific. See supplemental  
388 information (**Table S4-7**) for detailed instrumental parameters.

389  
390 **LC-MS/MS data analysis:** Raw data was converted to mzXML format using MS Convert  
391 software<sup>2930</sup>. Processing of the resulting mzXML files was done in MZmine version 2.30<sup>31</sup> (see  
392 **Table S8** for parameters). Data was filtered to only retain MS1 scans that were present in at least  
393 6 samples and were associated with MS2 spectra (and therefore could potentially be annotated).  
394 Blank removal was performed, with a minimum three-fold difference between blank and samples  
395 required in order for a feature to be retained. Total Ion Current (TIC) normalization was  
396 performed in Jupyter notebook using R (<http://jupyter.org>). Principal coordinate analysis (PCoA)  
397 was performed on the TIC-normalized MS1 data using the Bray-Curtis-Faith dissimilarity metric  
398 in QIIME 1<sup>32</sup>, visualized using Emperor<sup>33</sup>. PERMANOVA calculations were performed on  
399 Bray-Curtis-Faith distance matrices using the R package “vegan”<sup>34</sup>. The 3D GI tract model was  
400 built to scale from pictures of GI tract samples collected from our mice, using SketchUp 2017  
401 software. Data was plotted onto this 3D model using ‘ili’ (<https://ili.embl.de/>)<sup>35</sup>. Feature  
402 annotation was performed through molecular networking on the Global Natural Products Social  
403 Networking (GNPS) platform<sup>17</sup> (see **Table S9** for detailed parameters). All annotations are  
404 levels 2 or 3 according to the metabolomics standards initiative<sup>36</sup>. Molecular networks were  
405 visualized using Cytoscape<sup>3738</sup>. Venn diagrams were generated using:  
406 <http://bioinformatics.psb.ugent.be/webtools/Venn/>. Random forest analysis<sup>39</sup> was performed in  
407 Jupyter notebook using the randomForest R package and 7501 trees, classifying based on  
408 infected vs uninfected status. All code can be accessed at [https://github.com/mccall-lab-OU/GI-](https://github.com/mccall-lab-OU/GI-tract-paper)  
409 [tract-paper](https://github.com/mccall-lab-OU/GI-tract-paper).

410

411 **16S method and data analysis:** DNA was extracted from homogenized tissue samples using the  
412 DNeasy PowerSoil kit (Qiagen) following manufacturers protocols. The V4 hypervariable region  
413 of the 16S rRNA gene was amplified using barcoded Illumina-compatible primers 515F and  
414 806R as previously described<sup>40</sup>. The resulting amplicons were pooled in equimolar proportions  
415 and sequenced on an Illumina MiSeq Instrument. Paired end sequencing reads were quality  
416 filtered and merged to reconstruct the complete V4 region using AdapterRemovalV2<sup>41</sup>. These  
417 analysis-ready reads were used to identify operational taxonomic units (OTUs) following the  
418 UNOISE pipeline implemented in Usearch v10<sup>42</sup>. Taxonomy was assigned to the representative  
419 OTUs using the EzTaxon database<sup>43</sup>. The resulting OTU table was rarefied to a depth of 5,000  
420 reads per individual, and all downstream statistical analyses were performed using this rarefied  
421 OTU table. Alpha- (observed species) and beta-diversity (unweighted UniFrac) analyses were  
422 performed using scripts implemented in QIIME 1<sup>32</sup>. Kruskal-Wallis tests with FDR correction  
423 were used for comparison of genus-level taxonomic summaries to infection status and disease  
424 stage.

425

426 **Additional statistical information:** All statistical tests are paired. Non-parametric tests were  
427 used where possible (Mann-Whitney U-test), which makes no assumptions as to data normality.  
428 No additional tests of normality were performed. For acylcarnitine data analysis and Figure 2  
429 panels, where Mann-Whitney U-tests were performed for each sampling site, FDR correction  
430 was performed to adjust for multiple comparison, as specified in the text and in figure legends.  
431 Boxplots display first quartile, median and third quartile, with whiskers no more than 1.5 times  
432 interquartile range.

433

434 **Data Availability:** Metabolomics data have been deposited on MassIVE, accession numbers  
435 MSV000082614 (positive mode, oesophagus), MSV000082615 (negative mode, oesophagus),  
436 MSV000082618 (positive mode, stomach), MSV000082619 (negative mode, stomach),  
437 MSV000082612 (positive mode, small intestine), MSV000082613 (negative mode, small  
438 intestine), MSV000082616 (positive mode, large intestine and cecum), and MSV000082617  
439 (negative mode, large intestine and cecum). 16S data has been deposited in the NIH Short Read  
440 Archive, project number PRJNA553060. Molecular networks can be accessed here:

441 <https://gnps.ucsd.edu/ProteoSAFe/status.jsp?task=801f2cc53c504fad8e64a08565173309#>

442 (positive mode networking from mzXML files; used for annotations and dataset matching);  
443 <https://gnps.ucsd.edu/ProteoSAFe/status.jsp?task=4592e7dfd96c440f8885fb312d50e124>  
444 (positive mode feature-based molecular networking; used to cluster MS1 data into chemical  
445 families);  
446 <https://gnps.ucsd.edu/ProteoSAFe/status.jsp?task=d86b3d7c69c646479ef2cf5e7a432ba8>  
447 (negative mode networking from mzXML files; used for annotations and dataset matching);  
448 <https://gnps.ucsd.edu/ProteoSAFe/status.jsp?task=a6415577c1c24bc3823c9af5d9b5092c>  
449 (negative mode feature-based molecular networking; used to cluster MS1 data into chemical  
450 families). Interactive 3D maps of metabolomic data for representative animals can be accessed  
451 here: [https://ili.embl.de/?ftp://massive.ucsd.edu/MSV000082614/updates/2019-07-  
452 10\\_ehossain\\_cee84dec/other/3D\\_model\\_of\\_mouse  
453 2\\_ili.stl;ftp://massive.ucsd.edu/MSV000082614/updates/2019-07-  
454 10\\_ehossain\\_cee84dec/other/Pos\\_m10\\_ili.csv](https://ili.embl.de/?ftp://massive.ucsd.edu/MSV000082614/updates/2019-07-10_ehossain_cee84dec/other/3D_model_of_mouse_2_ili.stl;ftp://massive.ucsd.edu/MSV000082614/updates/2019-07-10_ehossain_cee84dec/other/Pos_m10_ili.csv) (mouse 10, infected, acute-stage sample  
455 collection) [https://ili.embl.de/?ftp://massive.ucsd.edu/MSV000082614/updates/2019-07-  
456 10\\_ehossain\\_cee84dec/other/3D\\_model\\_of\\_mouse  
457 2\\_ili.stl;ftp://massive.ucsd.edu/MSV000082614/updates/2019-07-  
458 10\\_ehossain\\_cee84dec/other/pos\\_m18\\_ili.csv](https://ili.embl.de/?ftp://massive.ucsd.edu/MSV000082614/updates/2019-07-10_ehossain_cee84dec/other/3D_model_of_mouse_2_ili.stl;ftp://massive.ucsd.edu/MSV000082614/updates/2019-07-10_ehossain_cee84dec/other/pos_m18_ili.csv) (mouse 18, uninfected, chronic-stage sample  
459 collection). All code can be accessed at <https://github.com/mccall-lab-OU/GI-tract-paper>.

460

## 461 **Acknowledgements:**

462 This work was supported by start-up funds from the University of Oklahoma to LIM. Initial  
463 tissue collection was supported by a postdoctoral fellowship to LIM from the Canadian Institutes  
464 of Health Research, award number 338511 ([www.cihr-irsc.gc.ca/](http://www.cihr-irsc.gc.ca/)). Microbial community  
465 analysis was supported in part by a National Institutes of Health grant, award number NIH 2R01-  
466 GM089886 to KS. The authors wish to thank Dr. James McKerrow and Dr. Jair Lage Siqueira-  
467 Neto (UCSD) for advice during the early stages of this project. Dr. John Kelly, London School  
468 of Hygiene & Tropical Medicine and Dr. Bruce Branchini, Connecticut College provided the  
469 red-shifted luciferase-expressing *T. cruzi* strain CL Brener used in these experiments.

470

## 471 **Author contributions:**

472 LIM designed the project. EH and LIM performed metabolite extractions and LC-MS  
473 instrumental analysis. EH, CW, DL, MK, CG and LIM performed LC-MS data analysis. DL  
474 built the 3D GI tract model. SLJ and DT performed *in vivo* experimentation, carnitine treatment,  
475 and tissue sample collection. SK and CMW performed DNA extractions and 16S library builds.  
476 KS performed the 16S sequencing and analysis. LIM, EH and KS wrote the paper.

477

## 478 **References:**

- 479 1. Bern, C. Chagas' Disease. *N. Engl. J. Med.* **373**, 456–466 (2015).
- 480 2. Gascon, J., Bern, C. & Pinazo, M.-J. Chagas disease in Spain, the United States and other non-  
481 endemic countries. *Acta Trop.* **115**, 22–27 (2010).
- 482 3. Rassi, A., Jr, Rassi, A. & Marin-Neto, J. A. Chagas disease. *Lancet* **375**, 1388–1402 (2010).
- 483 4. Tarleton, R. L. *Trypanosoma cruzi* and Chagas Disease: Cause and Effect. in *World Class Parasites*  
484 107–115 (2003).
- 485 5. Stanaway, J. D. & Roth, G. The burden of Chagas disease: estimates and challenges. *Glob. Heart* **10**,  
486 139–144 (2015).
- 487 6. Lewis, M. D. *et al.* Bioluminescence imaging of chronic *Trypanosoma cruzi* infections reveals  
488 tissue-specific parasite dynamics and heart disease in the absence of locally persistent infection. *Cell.*  
489 *Microbiol.* **16**, 1285–1300 (2014).
- 490 7. Lewis, M. D., Francisco, A. F., Taylor, M. C., Jayawardhana, S. & Kelly, J. M. Host and parasite  
491 genetics shape a link between *Trypanosoma cruzi* infection dynamics and chronic cardiomyopathy.  
492 *Cell. Microbiol.* **18**, 1429–1443 (2016).
- 493 8. Francisco, A. F. *et al.* Limited Ability of Posaconazole To Cure both Acute and Chronic  
494 *Trypanosoma cruzi* Infections Revealed by Highly Sensitive In Vivo Imaging. *Antimicrob. Agents*  
495 *Chemother.* **59**, 4653–4661 (2015).
- 496 9. Stensvold, C. R. & van der Giezen, M. Associations between Gut Microbiota and Common Luminal  
497 Intestinal Parasites. *Trends Parasitol.* **34**, 369–377 (2018).



- 498 10. McCall, L.-I. *et al.* Experimental Chagas disease-induced perturbations of the fecal microbiome and  
499 metabolome. *PLoS Negl. Trop. Dis.* **12**, e0006344 (2018).
- 500 11. Patti, G. J., Yanes, O. & Siuzdak, G. Innovation: Metabolomics: the apogee of the omics trilogy.  
501 *Nat. Rev. Mol. Cell Biol.* **13**, 263–269 (2012).
- 502 12. Mullard, A. 2018 FDA drug approvals. *Nature Reviews Drug Discovery* **18**, 85–89 (2019).
- 503 13. McCall, L.-I. *et al.* Mass Spectrometry-Based Chemical Cartography of a Cardiac Parasitic  
504 Infection. *Anal. Chem.* **89**, 10414–10421 (2017).
- 505 14. Rassi, A., Jr, Rassi, A. & Marcondes de Rezende, J. American trypanosomiasis (Chagas disease).  
506 *Infect. Dis. Clin. North Am.* **26**, 275–291 (2012).
- 507 15. Knubel, C. P. *et al.* Indoleamine 2,3-dioxygenase (IDO) is critical for host resistance against  
508 *Trypanosoma cruzi*. *FASEB J.* **24**, 2689–2701 (2010).
- 509 16. Knubel, C. P. *et al.* 3-Hydroxy kynurenine treatment controls *T. cruzi* replication and the  
510 inflammatory pathology preventing the clinical symptoms of chronic Chagas disease. *PLoS One* **6**,  
511 e26550 (2011).
- 512 17. Wang, M. *et al.* Sharing and community curation of mass spectrometry data with Global Natural  
513 Products Social Molecular Networking. *Nat. Biotechnol.* **34**, 828–837 (2016).
- 514 18. Wikoff, W. R. *et al.* Metabolomics analysis reveals large effects of gut microflora on mammalian  
515 blood metabolites. *Proc. Natl. Acad. Sci. U. S. A.* **106**, 3698–3703 (2009).
- 516 19. Uchimura, Y. *et al.* Antibodies Set Boundaries Limiting Microbial Metabolite Penetration and the  
517 Resultant Mammalian Host Response. *Immunity* **49**, 545–559.e5 (2018).
- 518 20. Robello, C. *et al.* The fecal, oral, and skin microbiota of children with Chagas disease treated with  
519 benznidazole. *PLoS One* **14**, e0212593 (2019).
- 520 21. Planer, J. D. *et al.* Synergy testing of FDA-approved drugs identifies potent drug combinations  
521 against *Trypanosoma cruzi*. *PLoS Negl. Trop. Dis.* **8**, e2977 (2014).
- 522 22. McCarville, J. L. & Ayres, J. S. Disease tolerance: concept and mechanisms. *Curr. Opin. Immunol.*  
523 **50**, 88–93 (2018).

- 524 23. Lewis, M. D. & Kelly, J. M. Putting Infection Dynamics at the Heart of Chagas Disease. *Trends*  
525 *Parasitol.* **32**, 899–911 (2016).
- 526 24. Tarleton, R. L. Chagas disease: a role for autoimmunity? *Trends in Parasitology* **19**, 447–451  
527 (2003).
- 528 25. Rodrigues-Dos-Santos, Í. *et al.* Exploring the parasite load and molecular diversity of *Trypanosoma*  
529 *cruzi* in patients with chronic Chagas disease from different regions of Brazil. *PLoS Negl. Trop. Dis.*  
530 **12**, e0006939 (2018).
- 531 26. Vinolo, M. A. R., Rodrigues, H. G., Nachbar, R. T. & Curi, R. Regulation of Inflammation by Short  
532 Chain Fatty Acids. *Nutrients* **3**, 858–876 (2011).
- 533 27. Sánchez-Valdéz, F. J., Padilla, A., Wang, W., Orr, D. & Tarleton, R. L. Spontaneous dormancy  
534 protects *Trypanosoma cruzi* during extended drug exposure. *eLife* **7**, (2018).
- 535 28. Francisco, A. F. *et al.* Nitroheterocyclic drugs cure experimental *Trypanosoma cruzi* infections more  
536 effectively in the chronic stage than in the acute stage. *Sci. Rep.* **6**, 35351 (2016).
- 537 29. Chambers, M. C. *et al.* A cross-platform toolkit for mass spectrometry and proteomics. *Nat.*  
538 *Biotechnol.* **30**, 918–920 (2012).
- 539 30. Kessner, D., Chambers, M., Burke, R., Agus, D. & Mallick, P. ProteoWizard: open source software  
540 for rapid proteomics tools development. *Bioinformatics* **24**, 2534–2536 (2008).
- 541 31. Pluskal, T., Castillo, S., Villar-Briones, A. & Oresic, M. MZmine 2: modular framework for  
542 processing, visualizing, and analyzing mass spectrometry-based molecular profile data. *BMC*  
543 *Bioinformatics* **11**, 395 (2010).
- 544 32. Caporaso, J. G. *et al.* QIIME allows analysis of high-throughput community sequencing data. *Nat.*  
545 *Methods* **7**, 335–336 (2010).
- 546 33. Vázquez-Baeza, Y., Pirrung, M., Gonzalez, A. & Knight, R. EMPERor: a tool for visualizing high-  
547 throughput microbial community data. *Gigascience* **2**, 16 (2013).
- 548 34. Dixon, P. VEGAN, a package of R functions for community ecology. *Journal of Vegetation Science*  
549 **14**, 927 (2003).

- 550 35. Protsyuk, I. *et al.* 3D molecular cartography using LC-MS facilitated by Optimus and 'ili software.  
551 *Nat. Protoc.* **13**, 134–154 (2018).
- 552 36. Sumner, L. W. *et al.* Proposed minimum reporting standards for chemical analysis. *Metabolomics* **3**,  
553 211–221 (2007).
- 554 37. Smoot, M. E., Ono, K., Ruscheinski, J., Wang, P.-L. & Ideker, T. Cytoscape 2.8: new features for  
555 data integration and network visualization. *Bioinformatics* **27**, 431–432 (2011).
- 556 38. Shannon, P. *et al.* Cytoscape: a software environment for integrated models of biomolecular  
557 interaction networks. *Genome Res.* **13**, 2498–2504 (2003).
- 558 39. Breiman, L. *Mach. Learn.* **45**, 5–32 (2001).
- 559 40. Sankaranarayanan, K. *et al.* Gut Microbiome Diversity among Cheyenne and Arapaho Individuals  
560 from Western Oklahoma. *Curr. Biol.* **25**, 3161–3169 (2015).
- 561 41. Schubert, M., Lindgreen, S. & Orlando, L. AdapterRemoval v2: rapid adapter trimming,  
562 identification, and read merging. *BMC Res. Notes* **9**, 88 (2016).
- 563 42. Edgar, R. C. & Flyvbjerg, H. Error filtering, pair assembly and error correction for next-generation  
564 sequencing reads. *Bioinformatics* **31**, 3476–3482 (2015).
- 565 43. Yoon, S.-H. *et al.* Introducing EzBioCloud: a taxonomically united database of 16S rRNA gene  
566 sequences and whole-genome assemblies. *Int. J. Syst. Evol. Microbiol.* **67**, 1613–1617 (2017).
- 567

568 **Figure legends:**

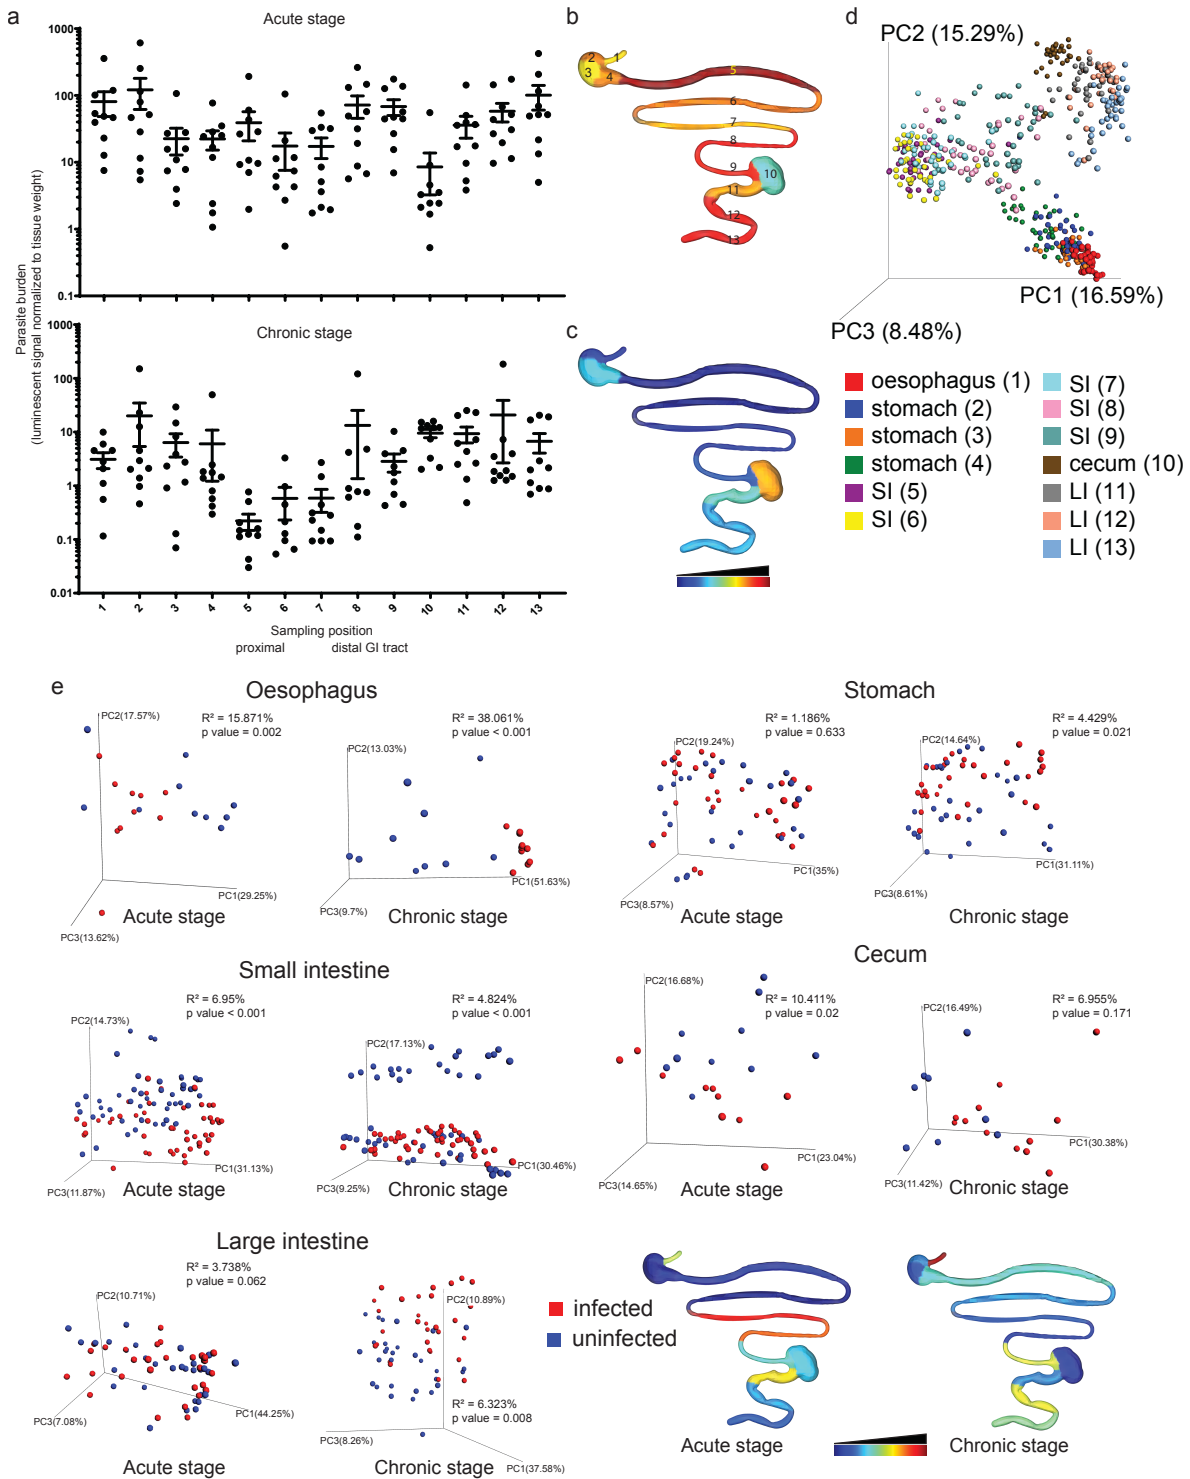

569 **Fig. 1. Spatial impact of *T. cruzi* infection is reflected by spatial modulation of the tissue**  
 570 **small molecule profile.** C3H/HeJ male mice (n=5 per group and per replicate) were mock-

571 infected or infected with 1,000 luminescent *T. cruzi* strain CL Brener trypomastigotes, in two  
572 biological replicates. GI samples were collected 12 and 89 days post-infection. (a) Parasite  
573 burden at each sampling site. GI was sectioned into 13 segments, and luminescence quantified at  
574 each site. To correct for variations in sample size, luminescence counts were normalized to  
575 sample weight, for each sample. Mean + standard error of mean are displayed. (b) Median  
576 luminescent signal at each sampling site, 12 days post-infection. Sampling positions are  
577 indicated. (c) Median luminescent signal at each sampling site, 89 days post-infection. Common  
578 scale for b and c. (d) Principal coordinate analysis showing separation between sampling sites in  
579 terms of overall chemical composition, even within a given organ (negative mode, all timepoints  
580 combined, Bray-Curtis-Faith distance metric;  $p < 0.001$   $R^2 = 13.918\%$  ). (e) Principal coordinate  
581 analysis showing significant chemical composition differences between infected and uninfected  
582 samples in oesophagus (acute stage, PERMANOVA  $p = 0.002$ ,  $R^2 = 15.871\%$ ; chronic stage  
583 PERMANOVA  $p < 0.001$ ,  $R^2 = 38.061\%$ ), stomach (chronic stage, PERMANOVA  $p = 0.021$ ,  
584  $R^2 = 4.429\%$ ; non-significant acute stage), small intestine, (acute stage, PERMANOVA  $p < 0.001$ ,  
585  $R^2 = 6.95\%$ ; chronic stage, PERMANOVA  $p < 0.001$ ,  $R^2 = 4.824$ ), cecum (acute stage, PERMANOVA  
586  $p = 0.02$ ,  $R^2 = 10.411\%$ ; non-significant chronic stage) and large intestine (chronic stage, PERMANOVA  
587  $p = 0.008$ ,  $R^2 = 6.323\%$ ; non-significant acute stage). Bottom right-hand panels display  $R^2$  at each  
588 sampling site (common logarithmic scale, acute and chronic stage).  
589

590

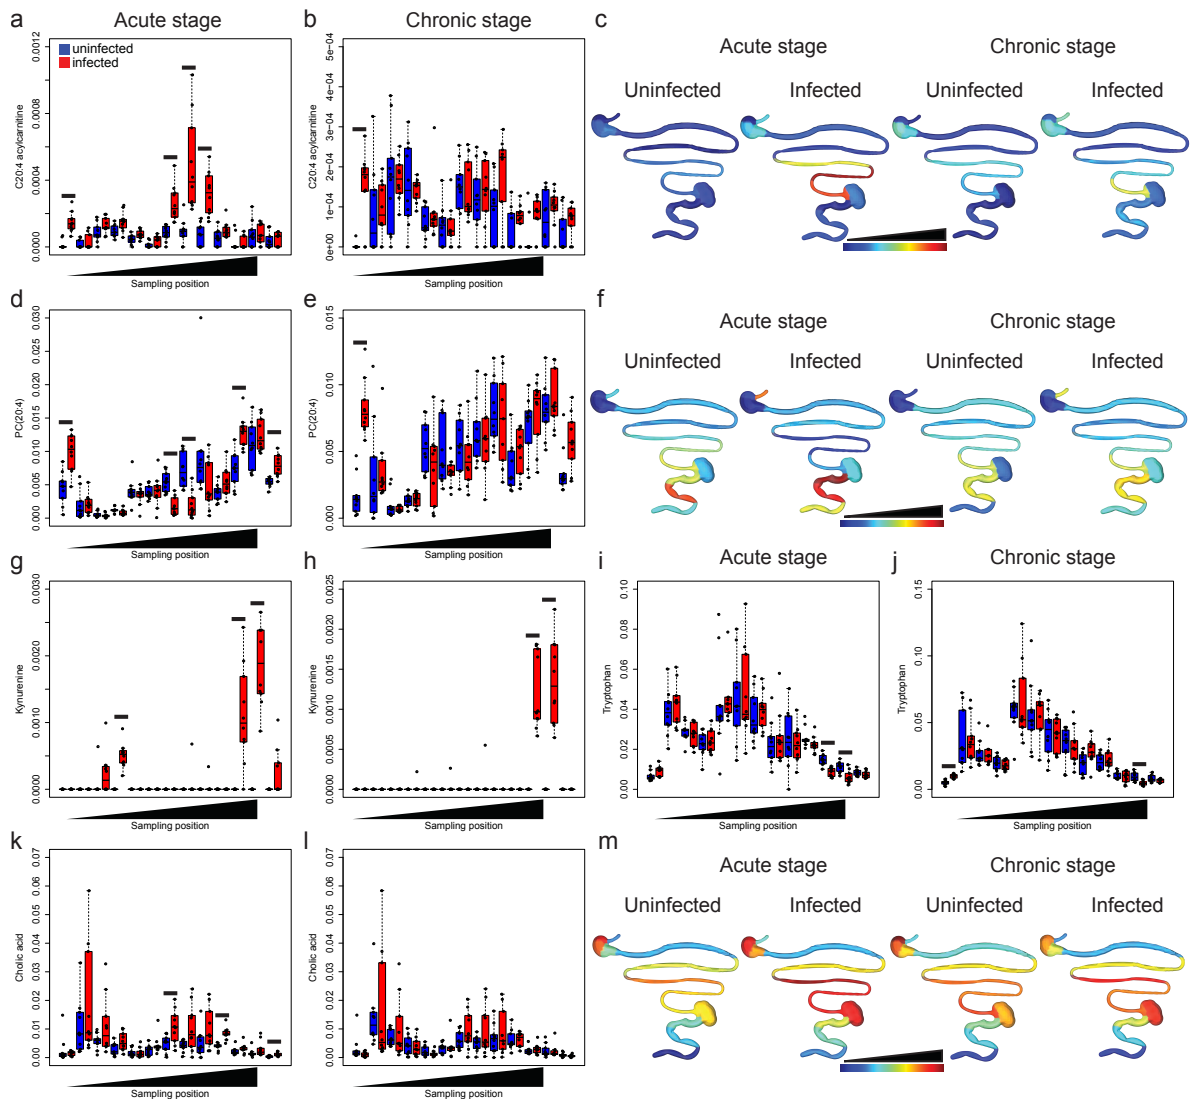

591

592 **Fig. 2. Common and tissue-specific metabolic changes identified by random forest**

593 **demonstrate persistence of these alterations at sites of CD.** (a) and (b) Infection-induced  
 594 elevation of C20:4 acylcarnitine in the oesophagus and small intestine in the acute stage,  
 595 persisting in the oesophagus in the chronic stage (FDR-corrected Mann-Whitney  $p=0.000988$ ,  
 596  $p=0.000141$ ,  $p=0.00107$ ,  $p=0.00107$  for acute-stage positions 1, 7, 8 and 9;  $p=0.0188$  for chronic-  
 597 stage position 1). (c) Spatial distribution of C20:4 acylcarnitine (median, common linear scale).  
 598 (d) and (e) Infection-induced elevation of PC(20:4) in the oesophagus and large intestine in the  
 599 acute stage, persisting in the oesophagus in the chronic stage. PC(20:4) was decreased in the  
 600 acute stage in the infected small intestine (FDR-corrected Mann-Whitney  $p=0.00189$ ,

601 p=0.000844, p=0.00158, p=0.000844, p=0.000891 for acute-stage positions 1, 7, 8, 11 and 13;  
602 p=0.000141 for chronic-stage position 1). (f) Spatial distribution of PC(20:4) (median, common  
603 linear scale). (g) and (h) Infection-induced elevation of kynurenine in the stomach and large  
604 intestine in the acute stage persists in the large intestine in the chronic stage (FDR-corrected  
605 Mann-Whitney p=0.000796, p=0.00100, p=0.000796 for acute-stage positions 4, 11 and 12;  
606 p=0.000415 and p=0.000415 for chronic-stage positions 11 and 12. (i) and (j) Infection-induced  
607 decrease in tryptophan at sites of increased kynurenine in the large intestine (acute and chronic  
608 stage). Infection also increased tryptophan in the oesophagus in the chronic stage. (FDR-  
609 corrected Mann-Whitney p=0.001689 and p=0.0136 for acute-stage positions 11 and 12;  
610 p=0.000281 and p=0.0253 for chronic-stage positions 1 and 12). All detected tryptophan adducts  
611 combined. (k) and (l) Infection-induced increase in small intestine, cecum and large intestine  
612 cholic acid (all detected adducts combined), acute stage only. (FDR-corrected Mann-Whitney  
613 p=0.0498, p=0.000281, p=0.0297 for acute-stage positions 7, 10 and 13). (m) Spatial distribution  
614 of cholic acid (median, common logarithmic scale). Black lines in panels (a-e) and (g-l) indicate  
615 FDR-corrected Mann-Whitney  $p < 0.05$ .

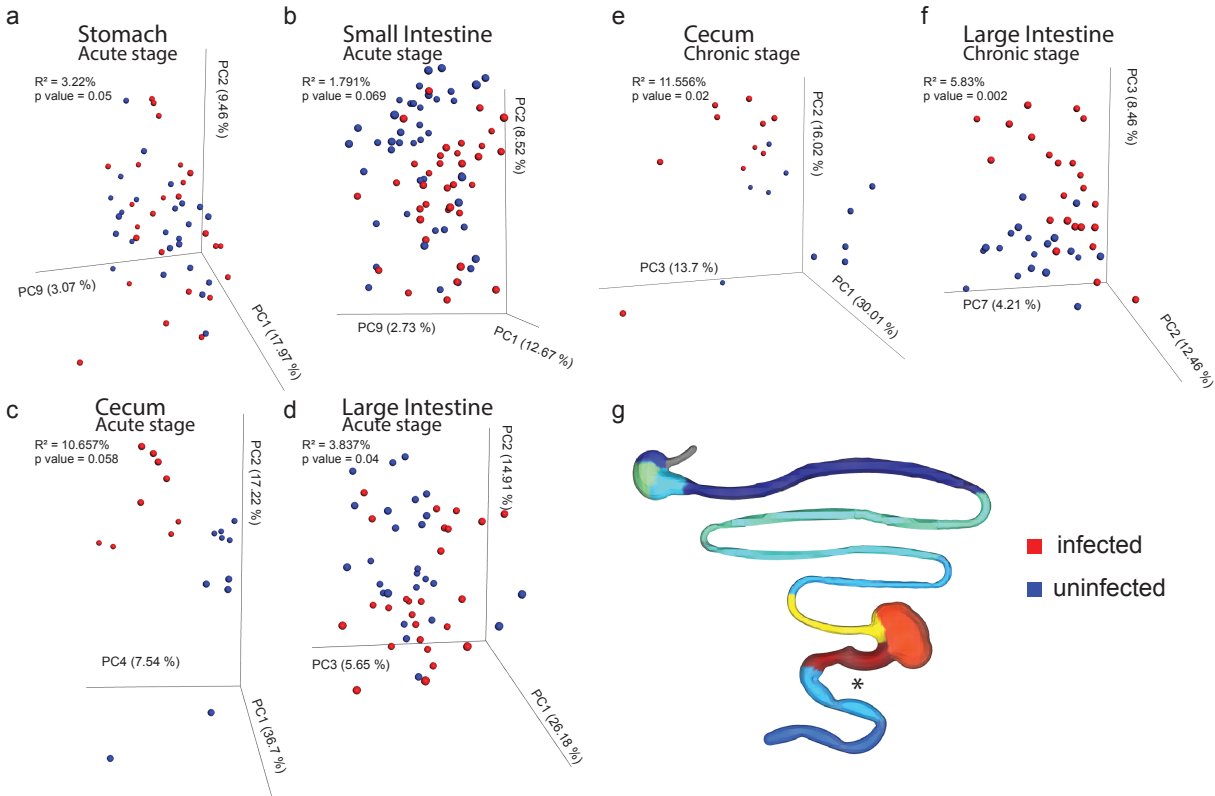

616

617 **Fig. 3. Persistent, spatially heterogeneous impact of *T. cruzi* infection on the microbiota.**

618 16S sequencing was performed on homogenate from all sampling sites except oesophagus in the  
619 acute stage, and focusing on large intestine and cecum in the chronic stage. Principal coordinate  
620 analysis revealed significant differences in the overall microbiota composition in the stomach (a)  
621 and large intestine (d) in the acute stage (PERMANOVA  $p=0.05$ ,  $R^2=3.22\%$  and PERMANOVA  
622  $p=0.04$ ,  $R^2=3.837\%$ , respectively), which persisted in the chronic stage for the large intestine (f,  
623 PERMANOVA  $p=0.002$ ,  $R^2=5.83\%$ ). Spatial heterogeneity was also observed within an organ  
624 (g), with the highest disturbances in the microbiota in the proximal large intestine (sampling  
625 position 11, PERMANOVA  $p=0.022$ ,  $R^2=12.36\%$  and PERMANOVA  $p=0.009$ ,  $R^2=10.715\%$  for  
626 acute and chronic stage, respectively). (g) displays  $R^2$  at each sampling site in the acute stage  
627 (logarithmic scale). \*, PERMANOVA  $p<0.05$ .



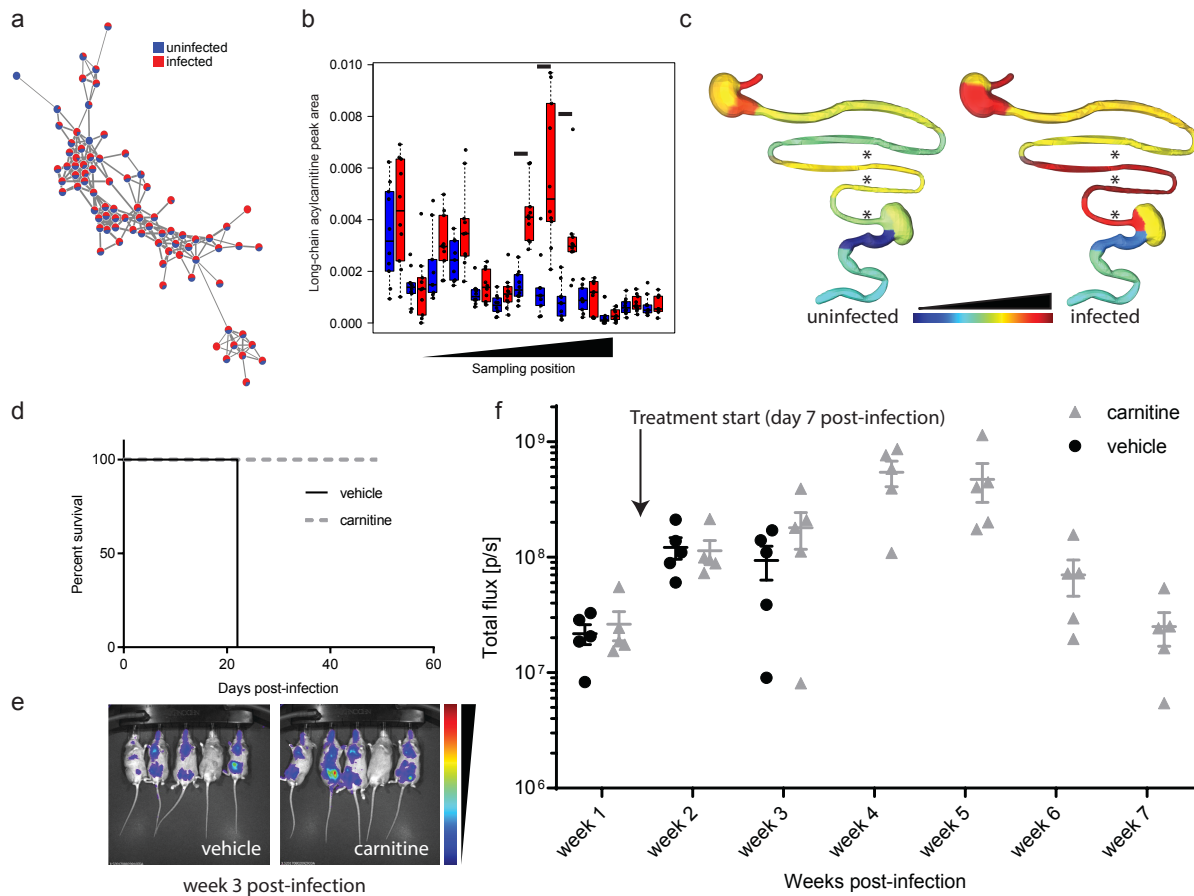

628

629 **Fig. 4. Chemical cartography reveals a causal role for carnitine metabolism in acute CD**

630 **tolerance.** (a) Acylcarnitine molecular network, showing relative abundance of each detected  
631 acylcarnitine chemical family member (all tissue sites and timepoints combined; MS2 spectral  
632 count relative abundance). Each node represents one metabolite feature. Connected nodes are

633 structurally similar (MS2 cosine score > 0.7), with edge thickness proportional to the cosine

634 score. (b) Infection-induced increases in long-chain acylcarnitines in the distal small intestine 12

635 days post-infection (black lines indicate FDR-corrected Mann-Whitney  $p < 0.05$ ;  $p = 0.000141$ ,

636  $p = 0.000563$ ,  $p = 0.000563$  for positions 7, 8, 9, comparing infected and uninfected samples for the

637 same positions) (c) Spatial distribution of median long-chain acylcarnitine peak area, 12 days

638 post-infection (common logarithmic scale). Stars indicate sites of statistical significance, as

639 displayed in panel b. (d) Carnitine treatment prevents acute-stage mortality. Male C3H/HeJ mice

640 ( $n = 5$  per group) were infected with 50,000 luciferase-expressing *T. cruzi* strain CL Brener. Seven

641 days post-infection, mice were switched to carnitine-supplemented drinking water (carnitine

642 group; 1.3%; equivalent to 100 mg/kg/day based on water consumption) or continued on normal

643 drinking water (vehicle group). All vehicle-treated mice reached humane endpoints at 22 days  
644 post-infection, whereas carnitine-treated mice survived the acute infection stage ( $p=0.0027$ ,  
645 Mantel-Cox test). (e) and (f) Comparable parasite burden was observed between carnitine-treated  
646 and vehicle groups, indicating that carnitine's pro-survival effects represent disease tolerance  
647 rather than antiparasitic efficacy. (e) Representative bioluminescent imaging, week 3 post-  
648 infection (common scale). (f) Overall whole-body luminescence, weeks 1-7 post-infection. Mean  
649 and standard error of mean are displayed.
